# Supplementary material
Source: PubMed Central journal article supplement (PMC3520615)

**TABLE S1**

**Complete description of human participant exercise programs**

| <b>Group</b>      | <b>Modality</b> | <b>Mon</b>                                                                                                                                                              | <b>Tues</b>                                                                                                                                                                                                                          | <b>Wed</b> | <b>Thurs</b>                                                                                                                                                            | <b>Fri</b>                                                                                                                                                                                                                           |
|-------------------|-----------------|-------------------------------------------------------------------------------------------------------------------------------------------------------------------------|--------------------------------------------------------------------------------------------------------------------------------------------------------------------------------------------------------------------------------------|------------|-------------------------------------------------------------------------------------------------------------------------------------------------------------------------|--------------------------------------------------------------------------------------------------------------------------------------------------------------------------------------------------------------------------------------|
| <b>Endurance</b>  | bicycle         | 60 min                                                                                                                                                                  | 60 min                                                                                                                                                                                                                               | 60 min     | 60 min                                                                                                                                                                  | 60 min                                                                                                                                                                                                                               |
|                   | weights         | none                                                                                                                                                                    | none                                                                                                                                                                                                                                 | none       | none                                                                                                                                                                    | none                                                                                                                                                                                                                                 |
| <b>Resistance</b> | bicycle         | none                                                                                                                                                                    | none                                                                                                                                                                                                                                 | none       | none                                                                                                                                                                    | none                                                                                                                                                                                                                                 |
|                   | weights         | <ul style="list-style-type: none"> <li>• Lunges</li> <li>• Leg Press</li> <li>• Leg Extension</li> <li>• Leg Curls</li> <li>• Toe Raises</li> <li>• Crunches</li> </ul> | <ul style="list-style-type: none"> <li>• Chest Press</li> <li>• Incline Dumbbell Bench Press</li> <li>• Lat Pulldowns</li> <li>• Seated Row</li> <li>• Lateral Raise</li> <li>• Triceps Extension</li> <li>• Biceps Curls</li> </ul> | none       | <ul style="list-style-type: none"> <li>• Lunges</li> <li>• Leg Press</li> <li>• Leg Extension</li> <li>• Leg Curls</li> <li>• Toe Raises</li> <li>• Crunches</li> </ul> | <ul style="list-style-type: none"> <li>• Chest Press</li> <li>• Incline Dumbbell Bench Press</li> <li>• Lat Pulldowns</li> <li>• Seated Row</li> <li>• Lateral Raise</li> <li>• Triceps Extension</li> <li>• Biceps Curls</li> </ul> |
| <b>Combined</b>   | bicycle         | 30 min                                                                                                                                                                  | 30 min                                                                                                                                                                                                                               | 30 min     | 30 min                                                                                                                                                                  | 30 min                                                                                                                                                                                                                               |
|                   | weights         | <ul style="list-style-type: none"> <li>• Leg Press</li> <li>• Leg Extension</li> <li>• Leg Curls</li> <li>• Crunches</li> </ul>                                         | <ul style="list-style-type: none"> <li>• Chest Press</li> <li>• Lat Pulldowns</li> <li>• Triceps Extension</li> <li>• Biceps Curls</li> </ul>                                                                                        | none       | <ul style="list-style-type: none"> <li>• Leg Press</li> <li>• Leg Extension</li> <li>• Leg Curls</li> <li>• Crunches</li> </ul>                                         | <ul style="list-style-type: none"> <li>• Chest Press</li> <li>• Lat Pulldowns</li> <li>• Triceps Extension</li> <li>• Biceps Curls</li> </ul>                                                                                        |
| <b>Control</b>    | bicycle         | none                                                                                                                                                                    | none                                                                                                                                                                                                                                 | none       | none                                                                                                                                                                    | none                                                                                                                                                                                                                                 |
|                   | weights         | none                                                                                                                                                                    | none                                                                                                                                                                                                                                 | none       | none                                                                                                                                                                    | none                                                                                                                                                                                                                                 |

## Figure S1 - Refers to Figure 1

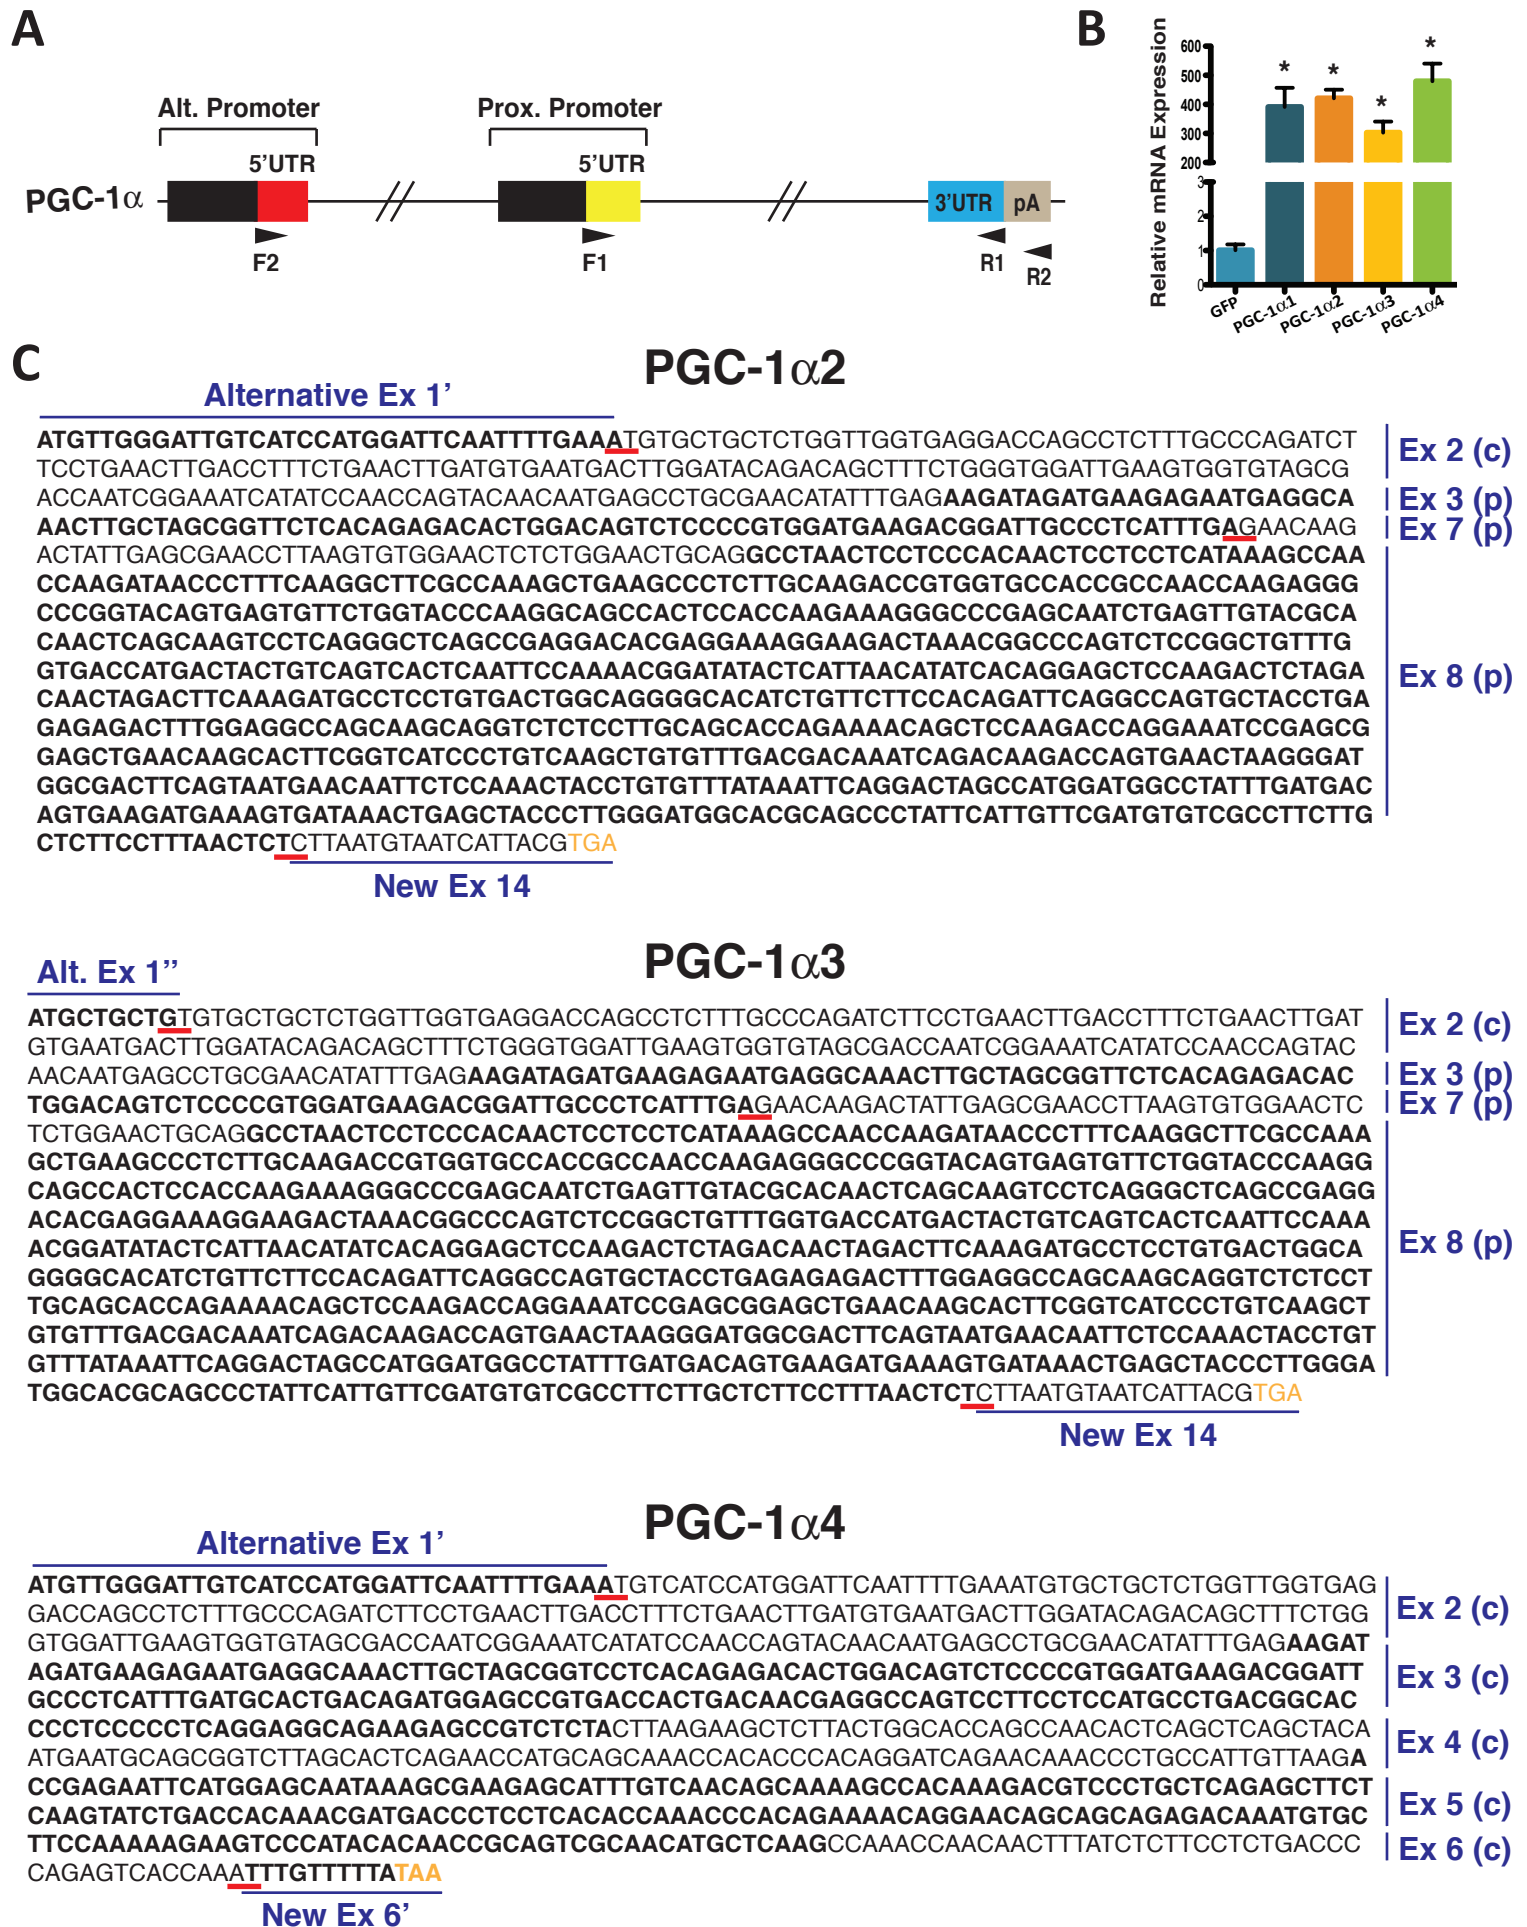

## Figure S2 - Refers to Figure 2

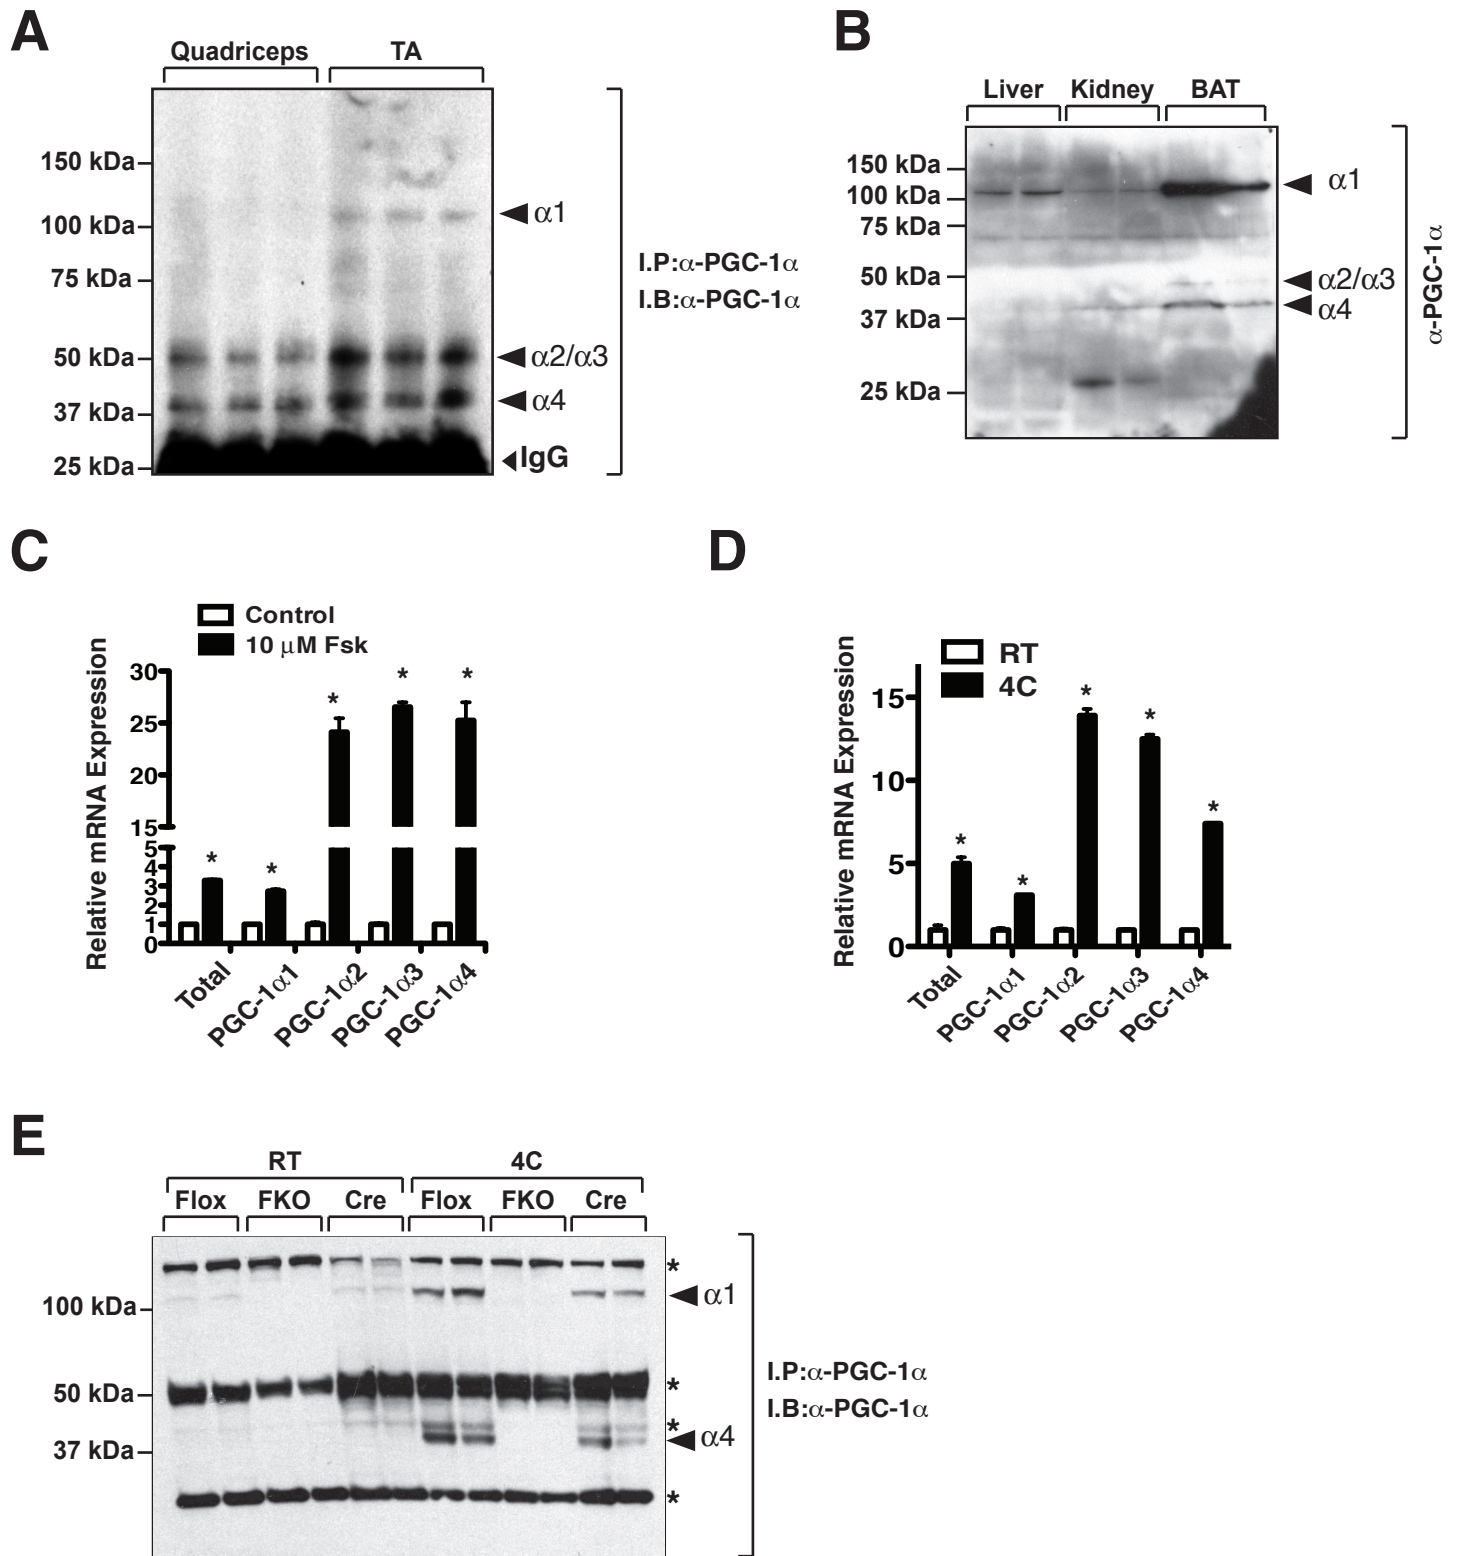

## Figure S3 - Relates to Figure 3

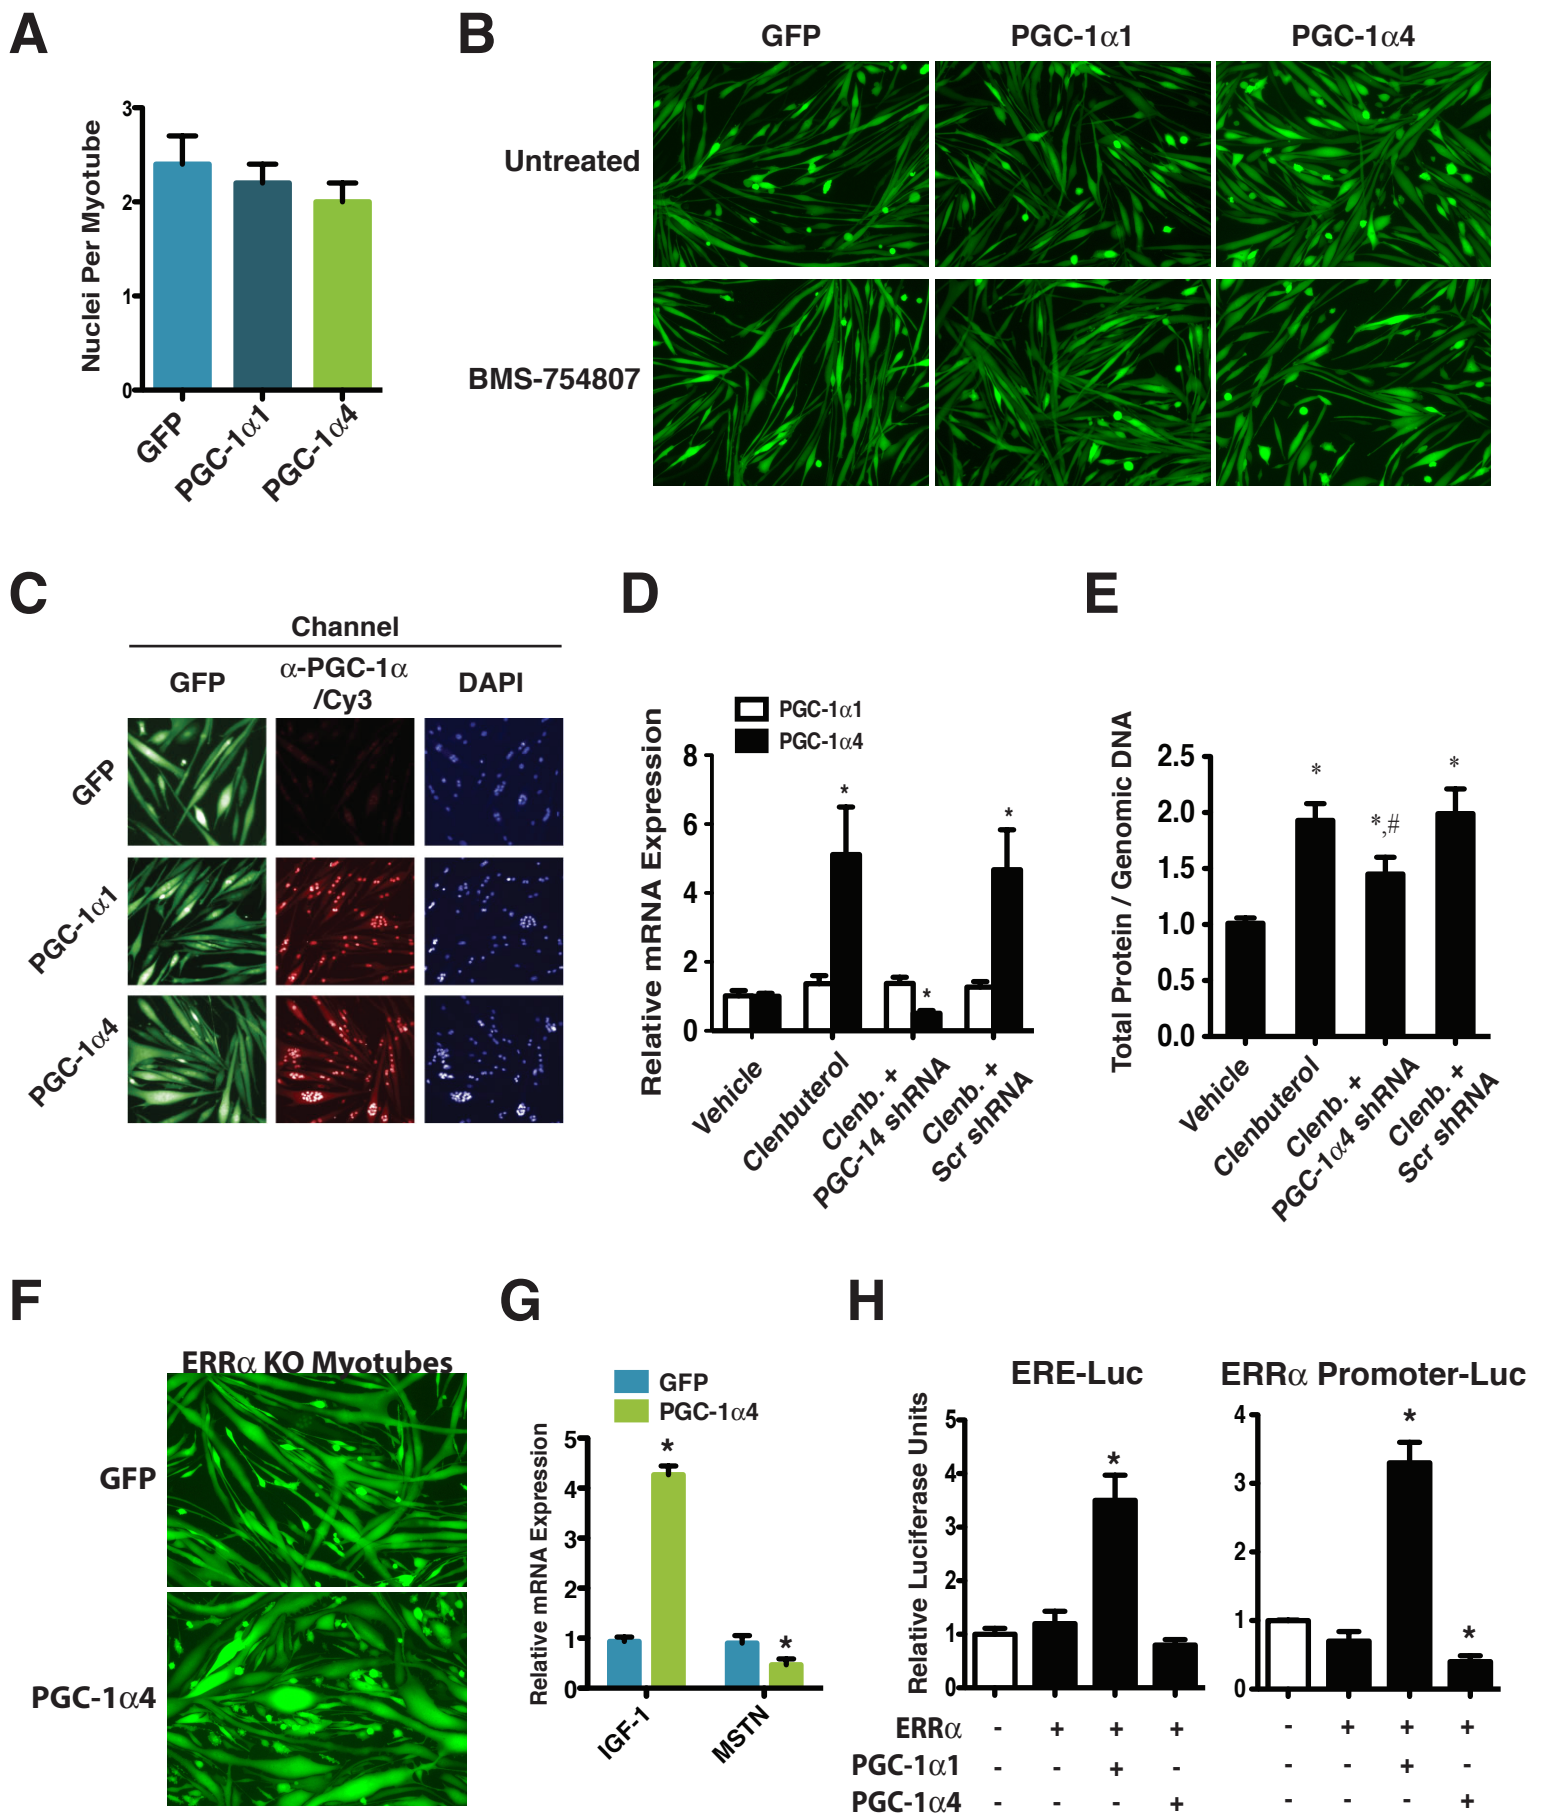

## Figure S4 - Refers to Figure 4

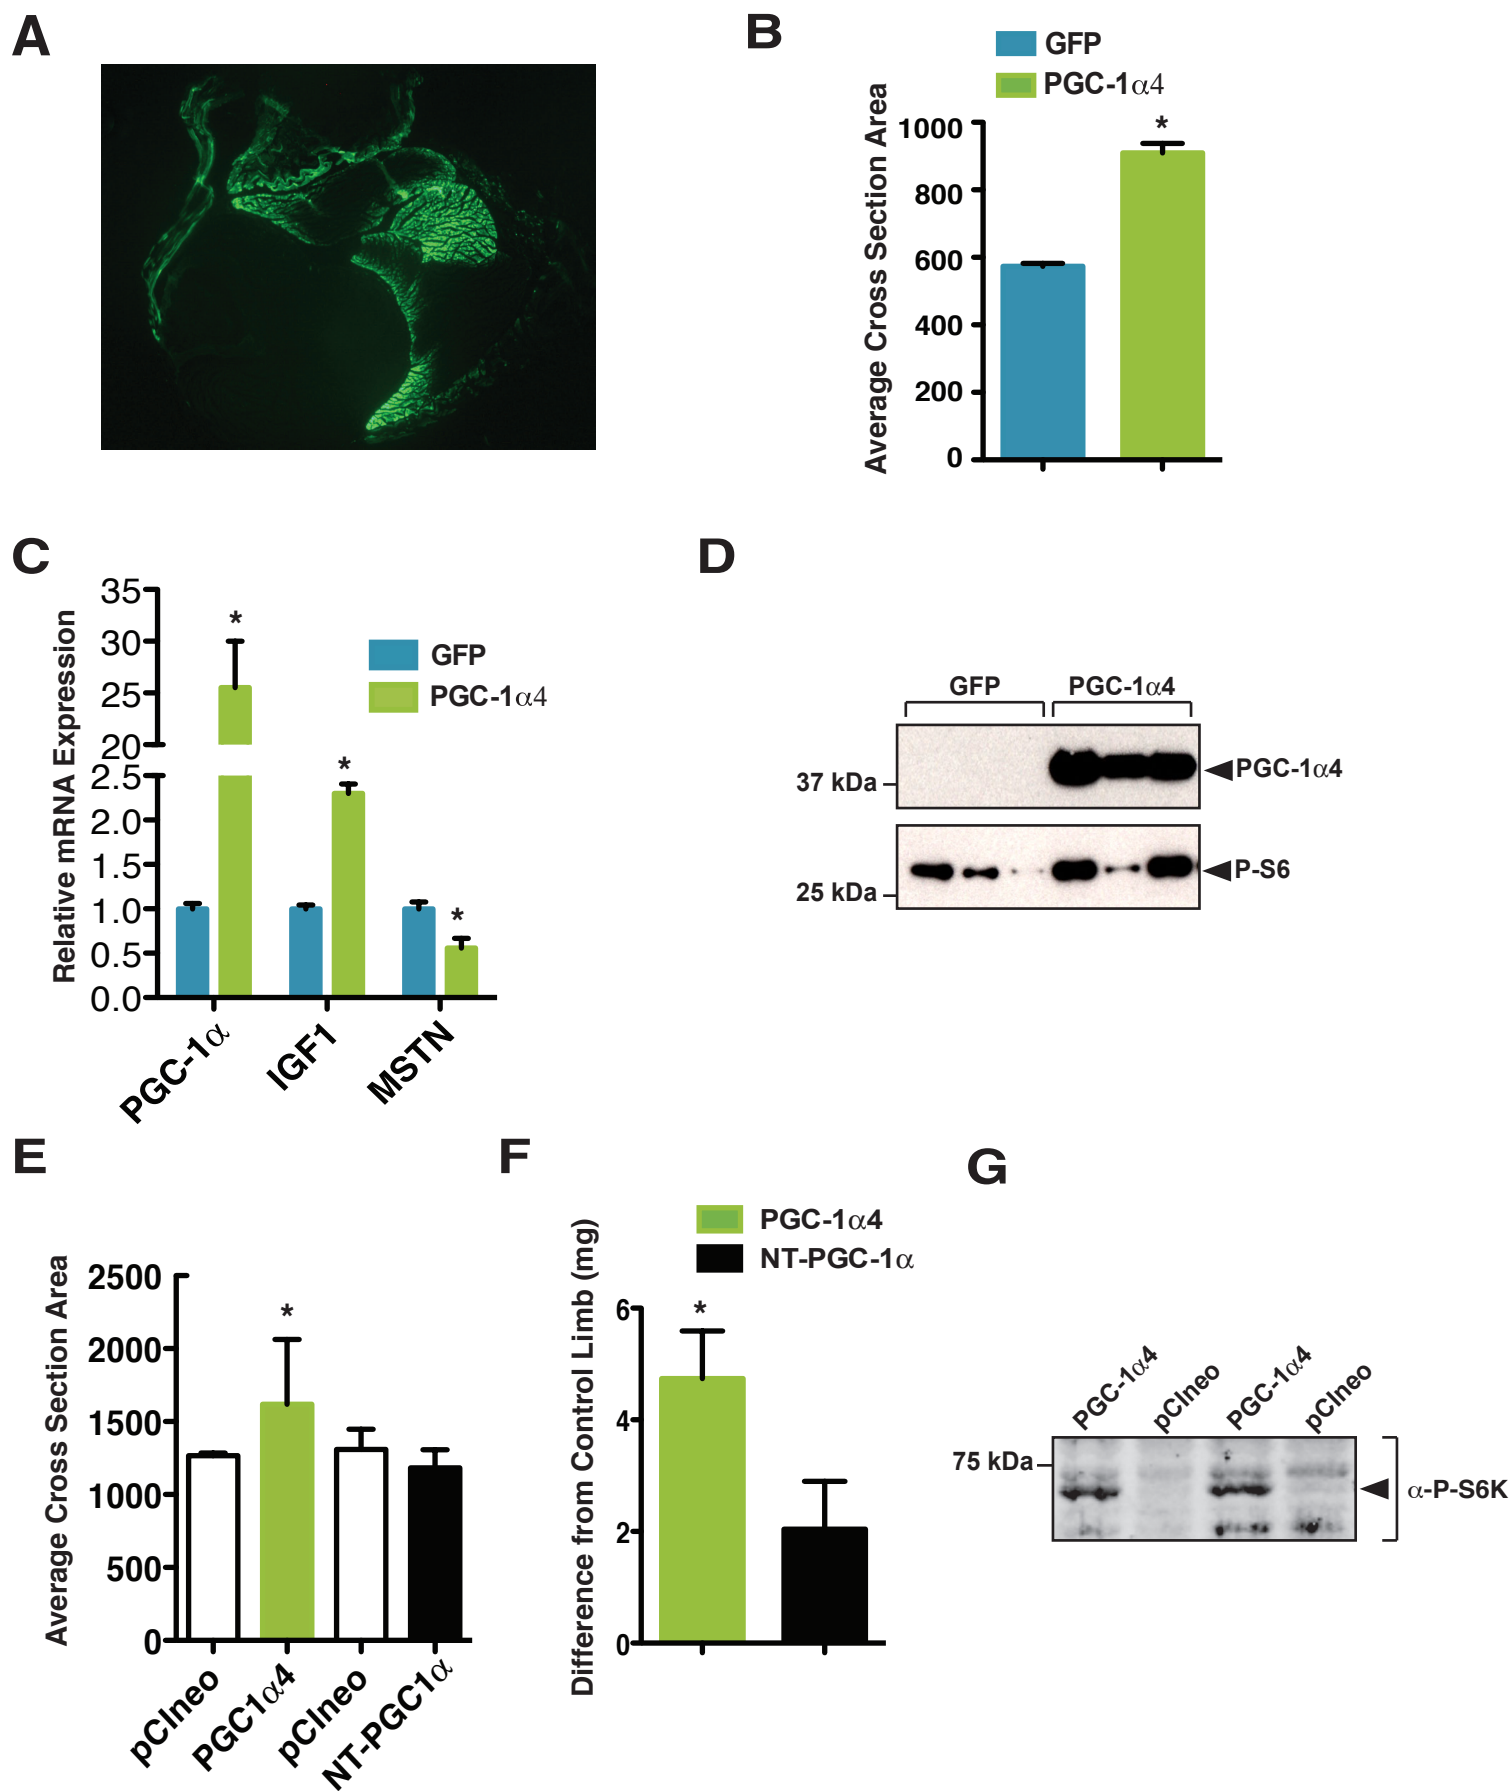

## Figure S5 - Refers to Figure 5

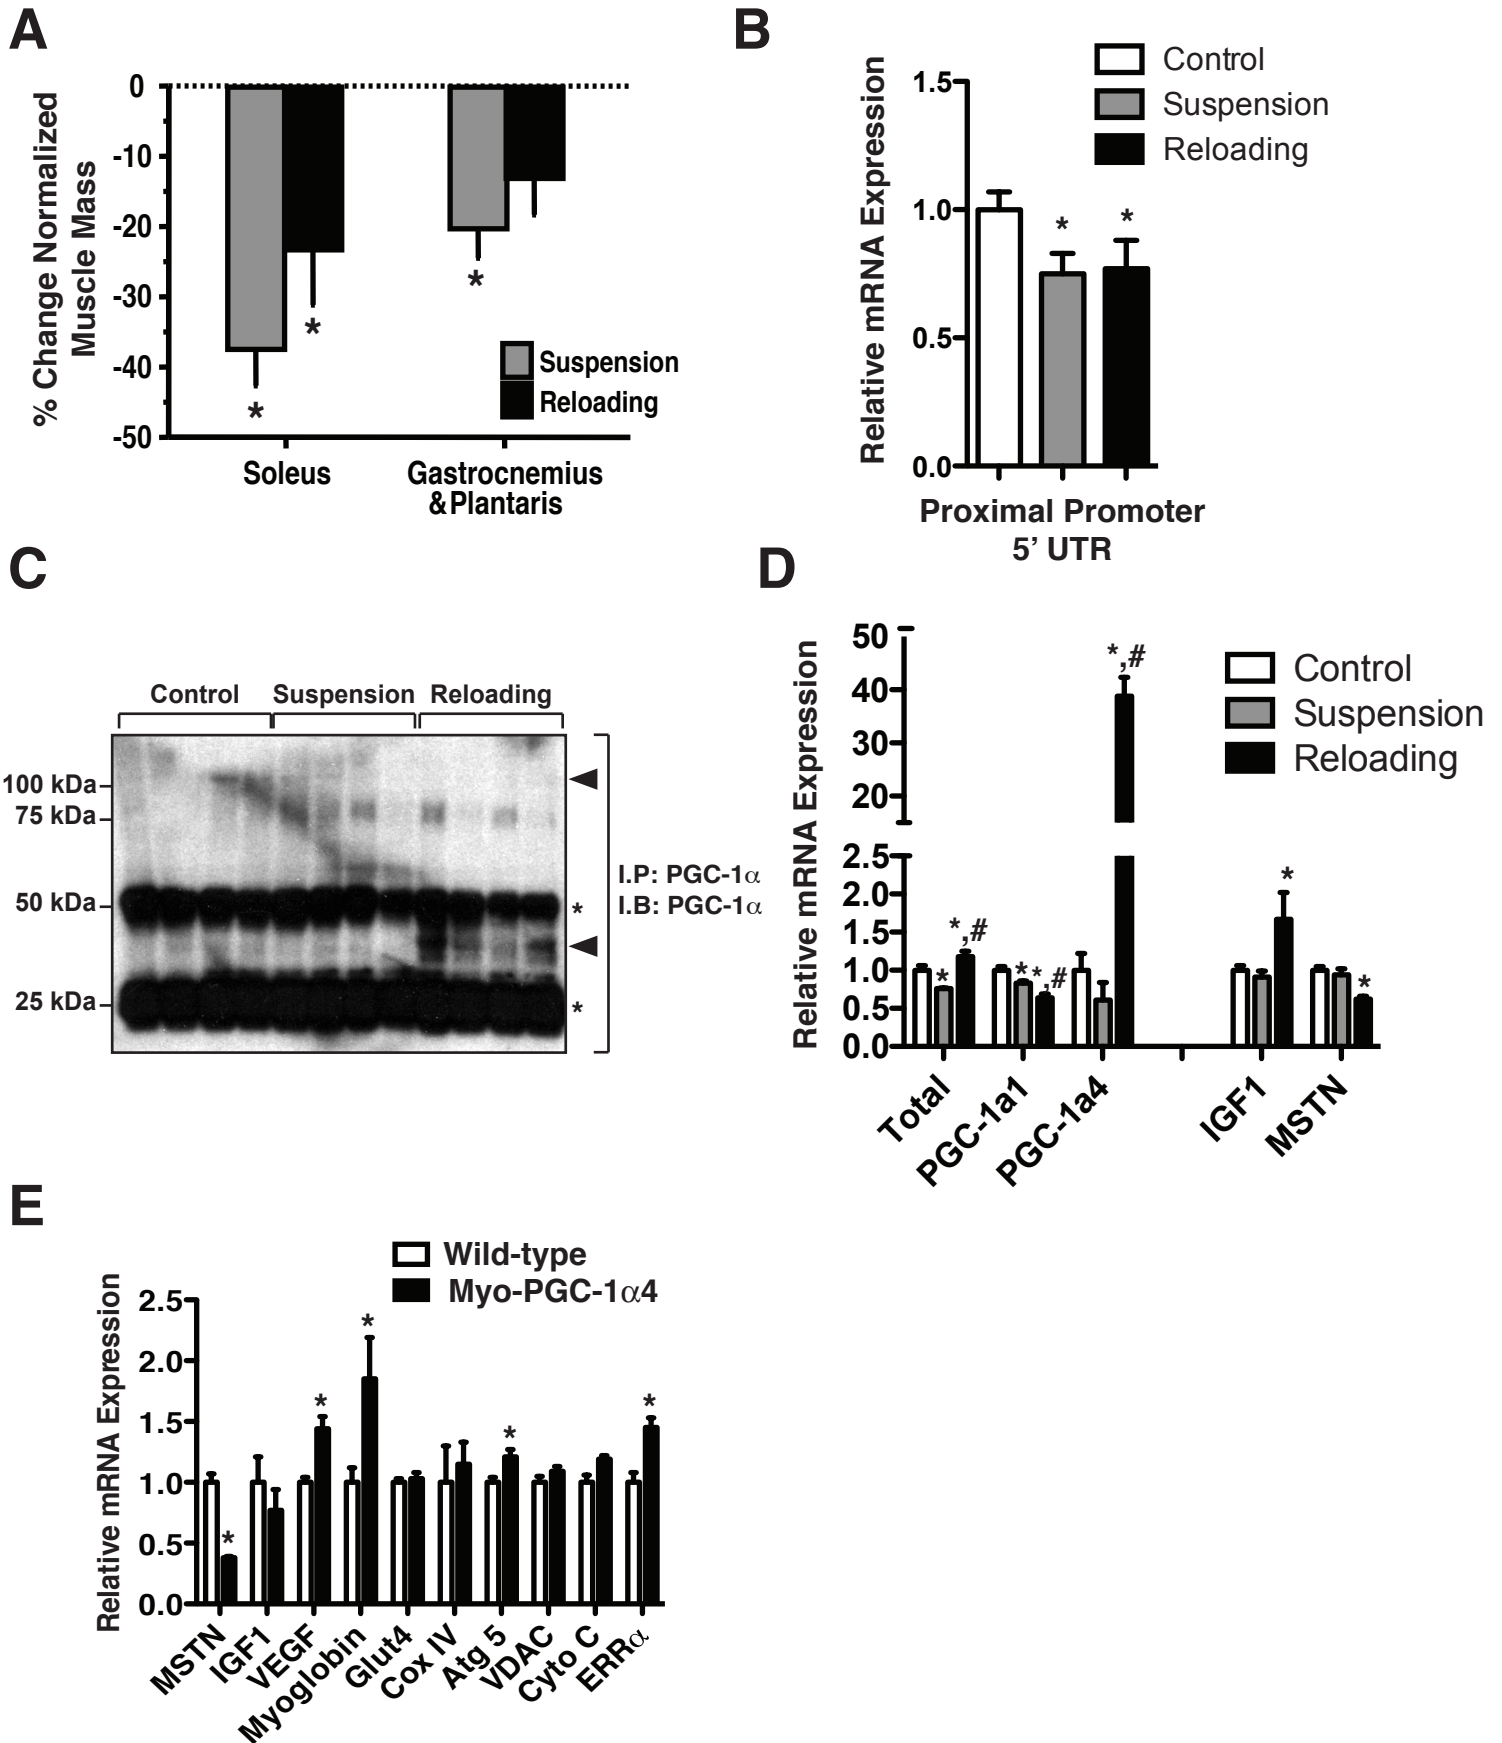

## Figure S6 - Relates to Figure 6

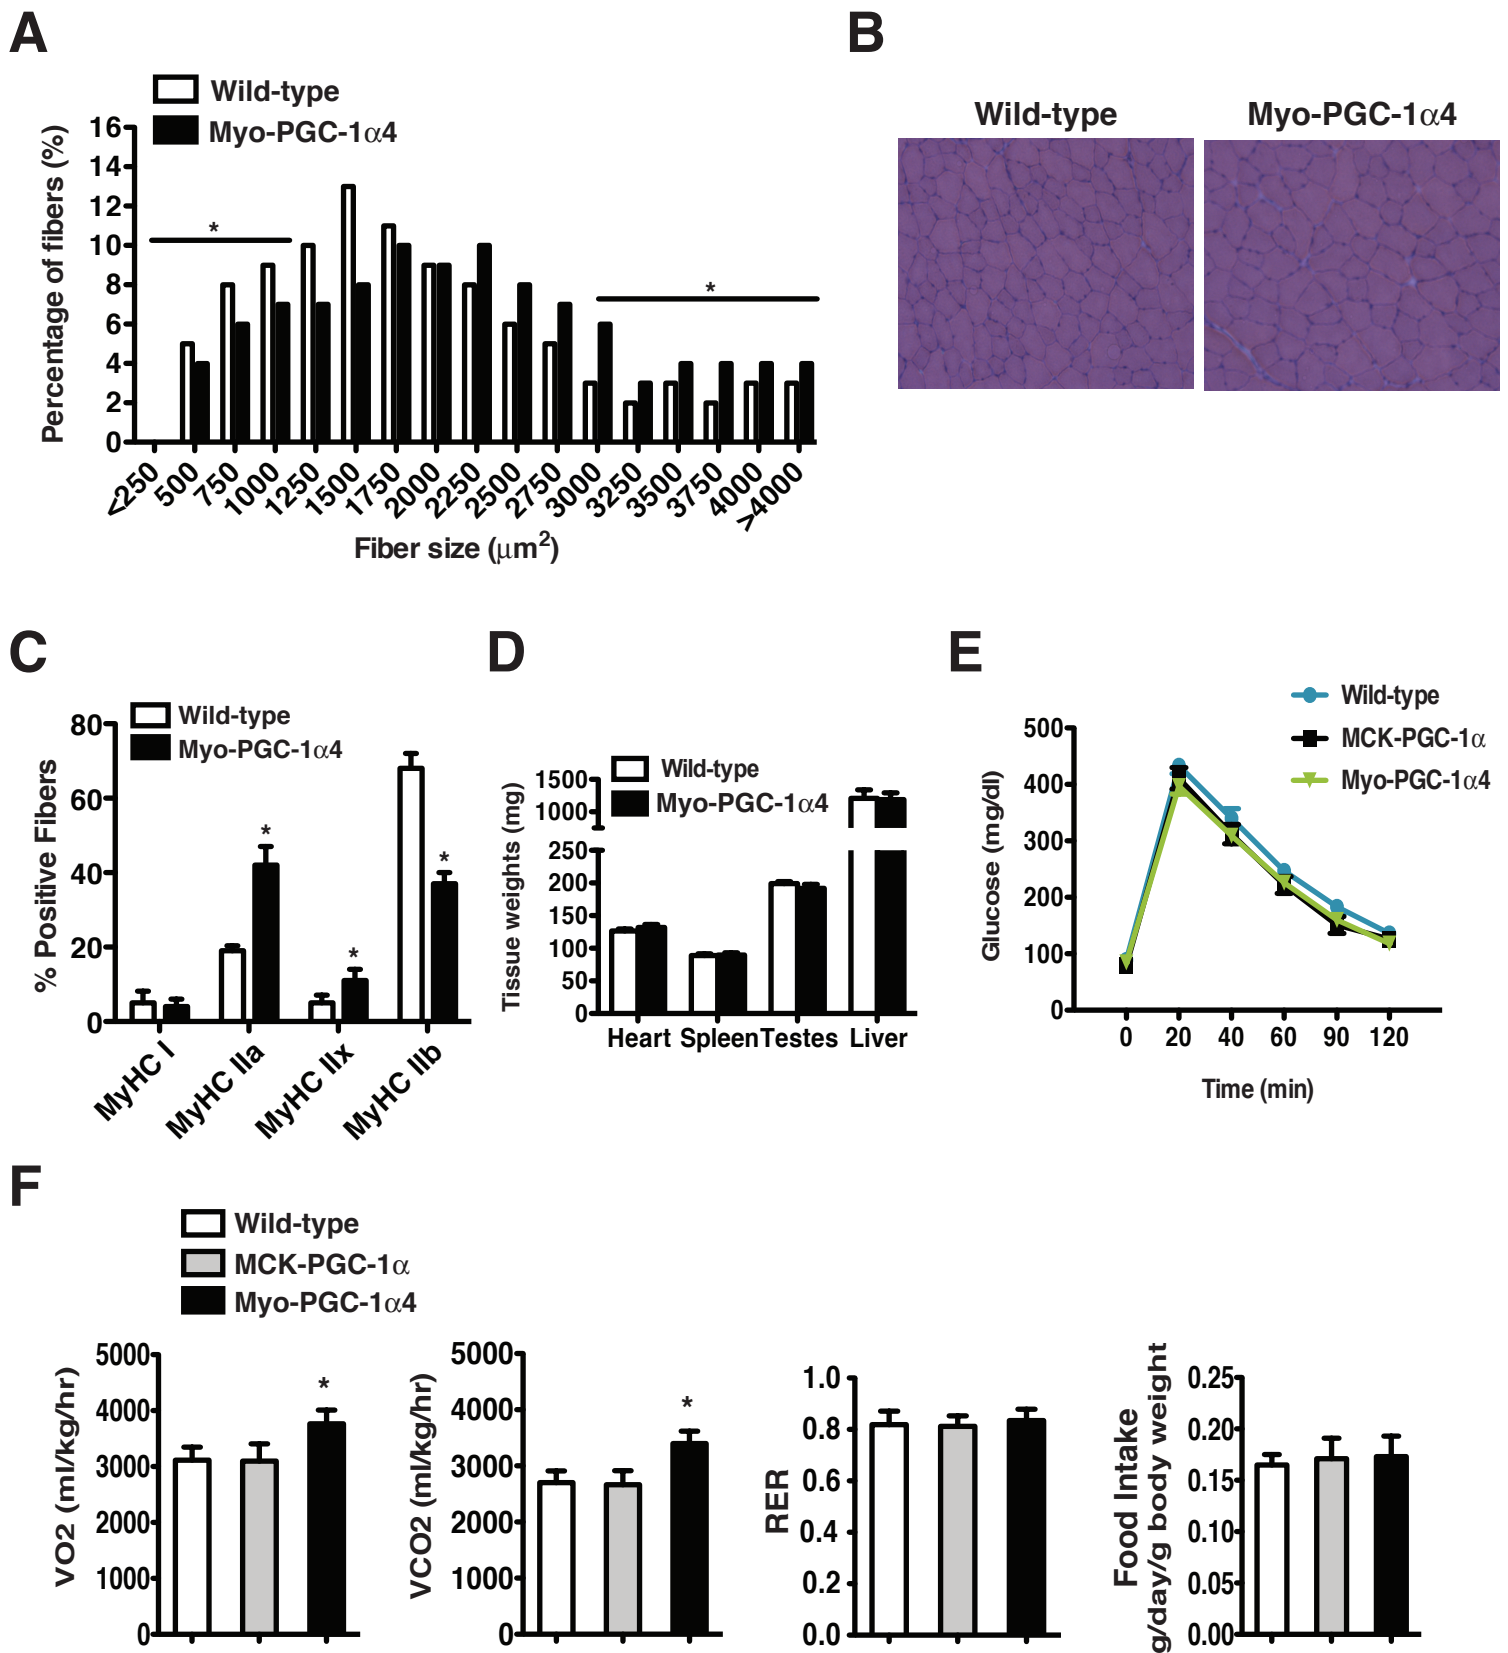

## Figure S7 - Relates to Figure 7

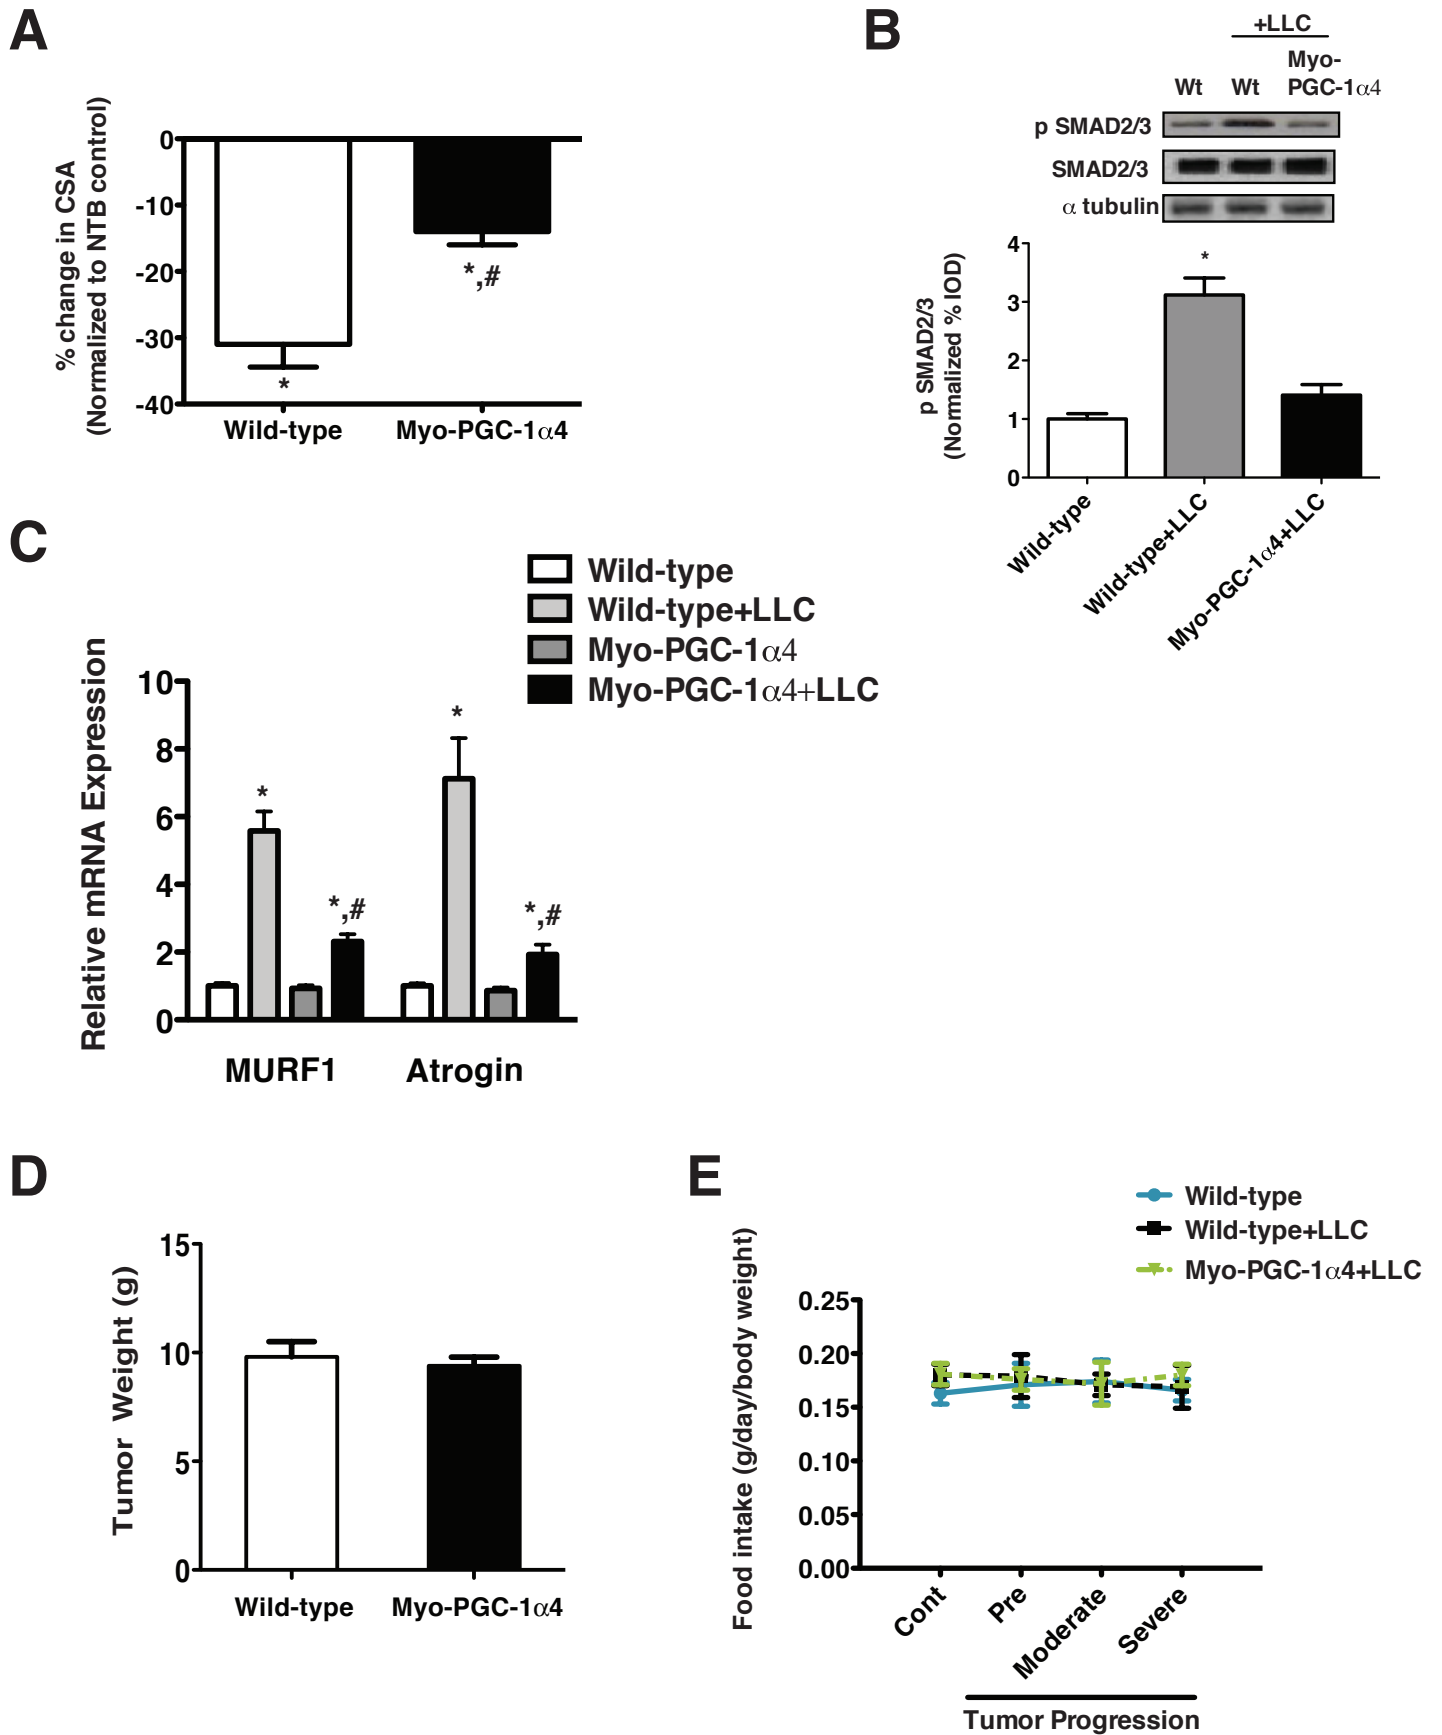

Supplement: NIHMS423102-supplement-02.pdf [file NIHMS423102-supplement-02.pdf]
